# Supplementary material for: Fine-tuning the regulation of Cas9 expression levels for efficient CRISPR-Cas9 mediated recombination in Streptomyces
Source: PubMed Central journal article supplement (PMC7244461; doi:10.1007/s10295-020-02277-5), 2020-05-04
Supplement: 10295_2020_2277_MOESM1_ESM.pdf [file 10295_2020_2277_MOESM1_ESM.pdf]

# **Fine tuning the regulation of Cas9 expression levels for efficient CRISPR-Cas9 mediated recombination in *Streptomyces***

Suhui Ye<sup>1,2</sup>, Behnam Enghiad<sup>3</sup>, Huimin Zhao<sup>3</sup>, Eriko Takano<sup>1</sup>

Affiliation:

<sup>1</sup> Manchester Centre for Synthetic Biology of Fine and Speciality Chemicals (SYNBIOCHEM), Manchester Institute of Biotechnology, Department of Chemistry, School of Natural Sciences, Faculty of Science and Engineering, University of Manchester, 131 Princess Street, Manchester M1 7DN, United Kingdom

<sup>2</sup> Present address: Research Group BIONUC (Biotechnology of Nutraceuticals and Bioactive Compounds), Departamento de Biología Funcional, Área de Microbiología, Universidad de Oviedo, Avenida Julián Clavería s/n, 33006, Oviedo, Principality of Asturias, Spain. IUOPA (Instituto Universitario de Oncología del Principado de Asturias), ISPA (Instituto de Investigación Sanitaria del Principado de Asturias).

<sup>3</sup> Department of Chemical and Biomolecular Engineering, and Carl R. Woese Institute for Genomic Biology, University of Illinois at Urbana-Champaign, Urbana, IL 61801, United States

Corresponding author: eriko.takano@manchester.ac.uk

**Figure S1.** Maps of plasmids used in this study. Annealing sites for primers used for their assembly are indicated.

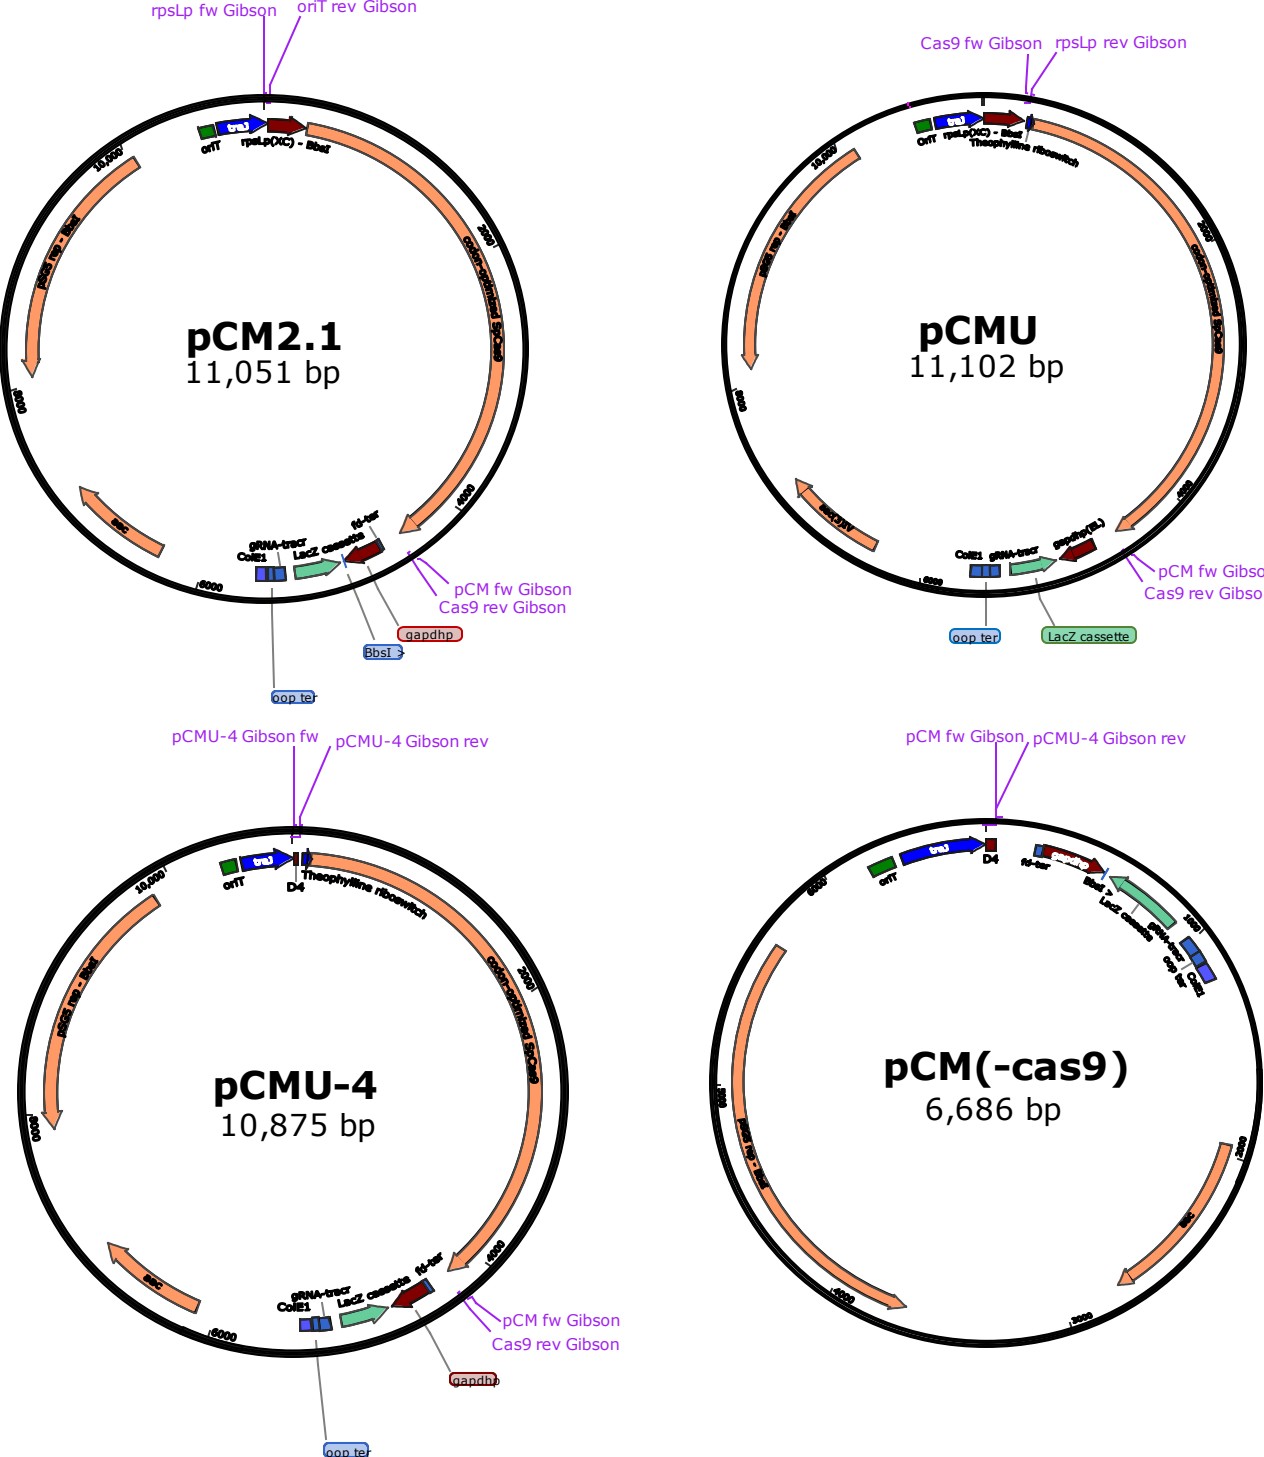

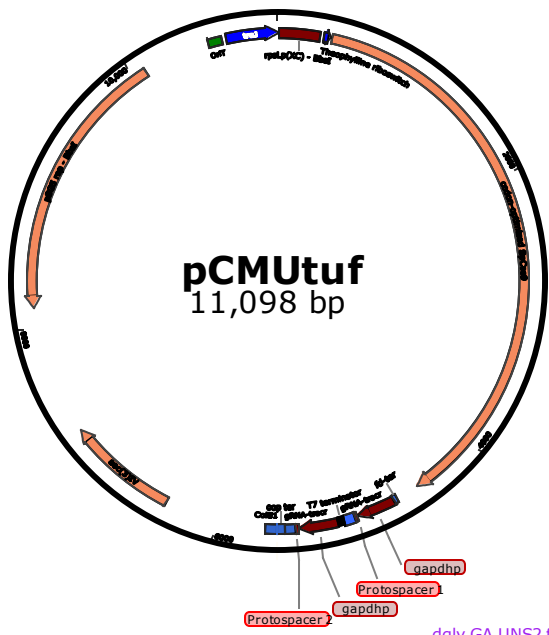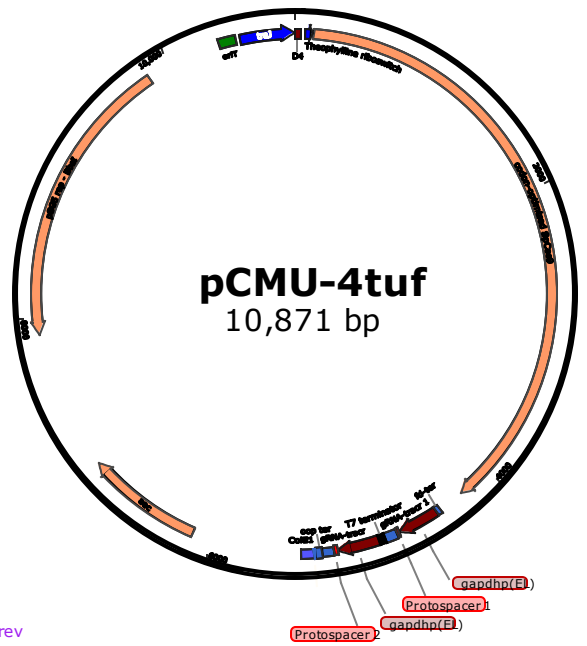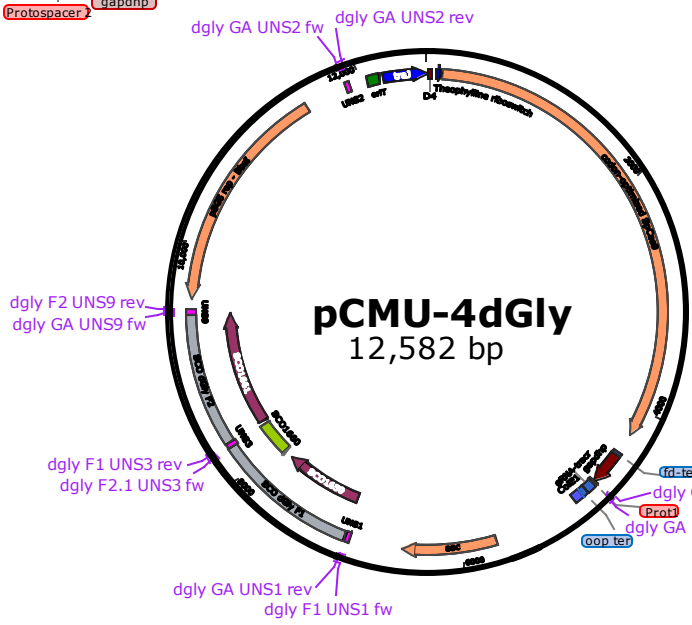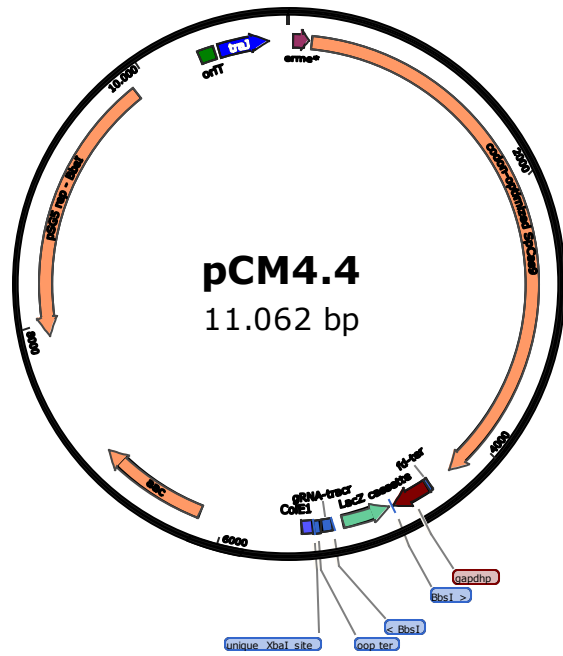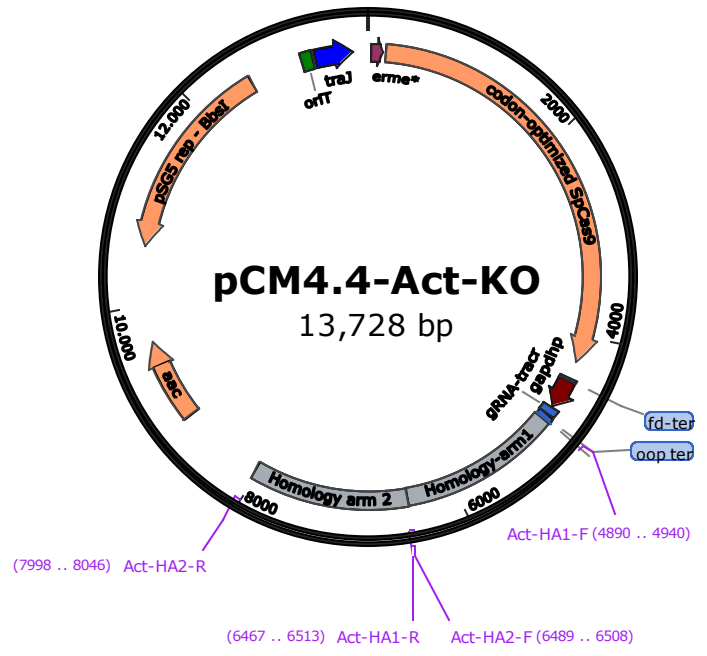

**Figure S2.** Representation of glycerol uptake operon in wild type (WT) and mutant strains, showing annealing sites for primers used to amplify homologous arms for pCMU-4dGly assembly as well as the cutting site for the designed protospacer. Primers used for mutants DNA verification (green and blue) and expected size for the corresponding PCR fragments are shown.

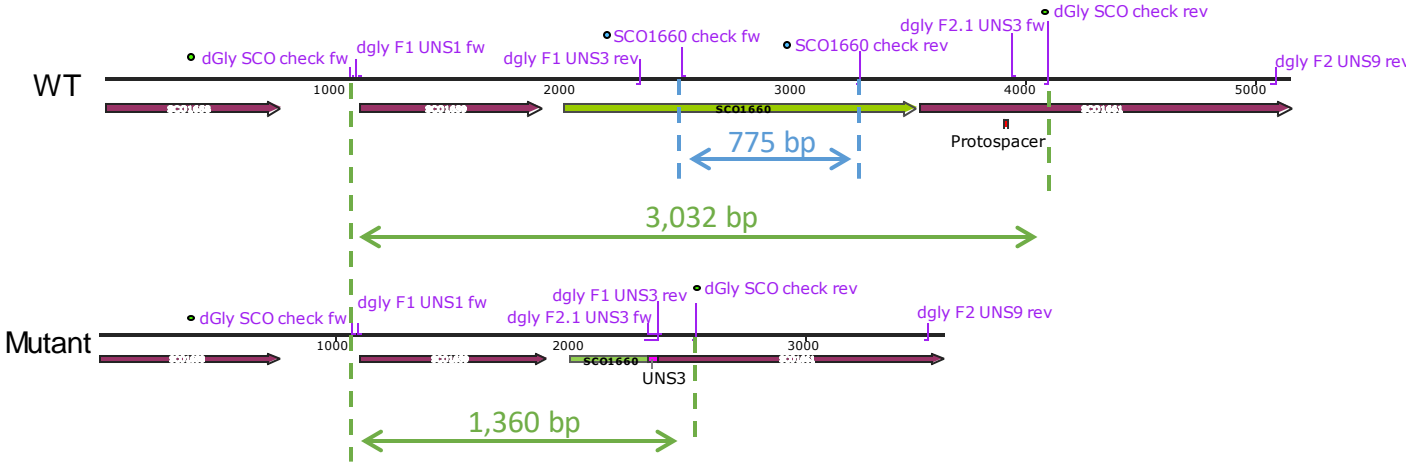

**Figure S3.** Plates incubated for 6 days against 0, 0.5, 1 and 2 mM theophylline from conjugations with pCM(-cas9) (control of conjugation, lacks cas9), pCMU (theophylline riboswitch between *rpsLp* and *cas9*) or pCMUtuf (control of Cas9 activity, pCMU containing 2 protospacers targeting *tuf1* gene but no homology repair template), of A) *S. coelicolor* and B) *S. lividans*. Main features of each plasmid are depicted next to each set of plates for better understanding.

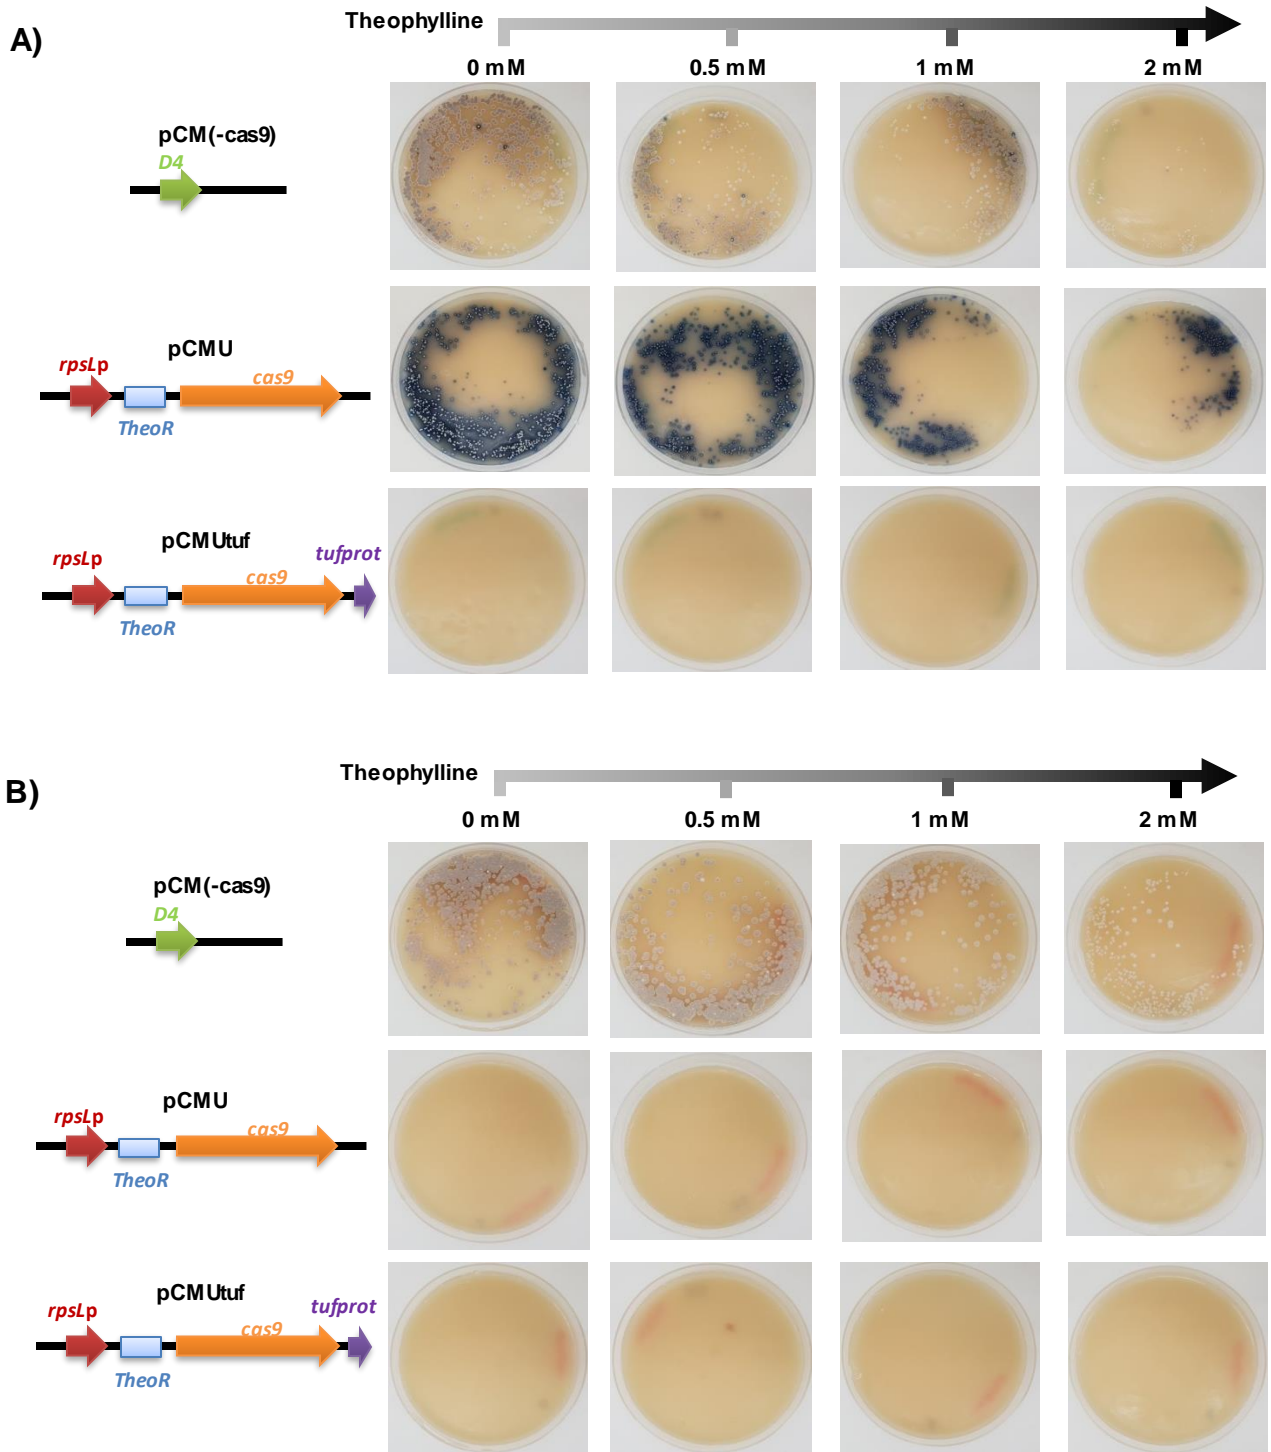

**Figure S4.** Plates incubated for 6 days against 0, 0.5, 1 and 2 mM theophylline from conjugations with pCM(-cas9) (control of conjugation, lacks *cas9*), pCMU-4 (theophylline riboswitch between *D4* promoter and *cas9*) or pCMU4uf (control of Cas9 activity, pCMU-4 containing 2 protospacers targeting *tuf1* gene but no homology repair template), of A) *S. coelicolor* and B) *S. lividans*. Main features of each plasmid are depicted next to each set of plates for better understanding.

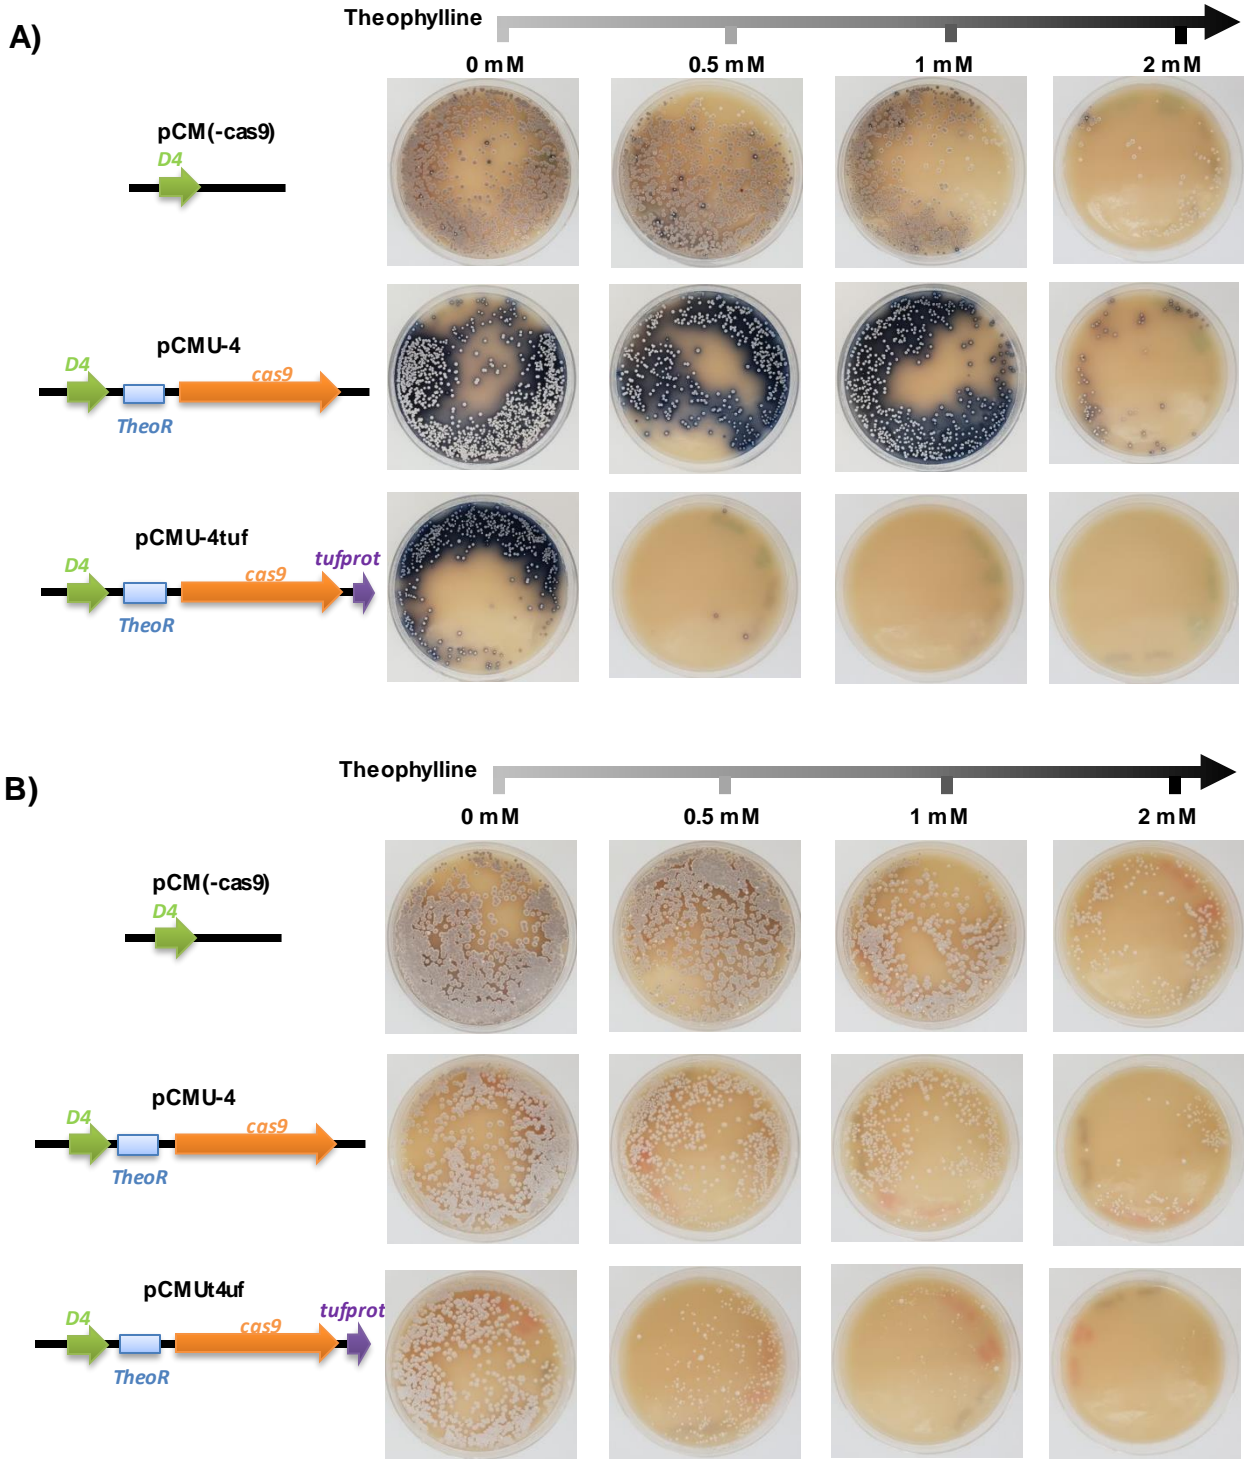

**Figure S5.** Plates incubated for 10 days against 0, 0.5, 1 and 2 mM theophylline from conjugations with pCM(-cas9) (control of conjugation, lacks *cas9*), pCMU-4 (theophylline riboswitch between *D4* promoter and *cas9*) or pCMUtuf (control of Cas9 activity, pCMU-4 containing 2 protospacers targeting *tuf1* gene but no homology repair template), of *S. lividans*. Main features of each plasmid are depicted next to each set of plates for better understanding.

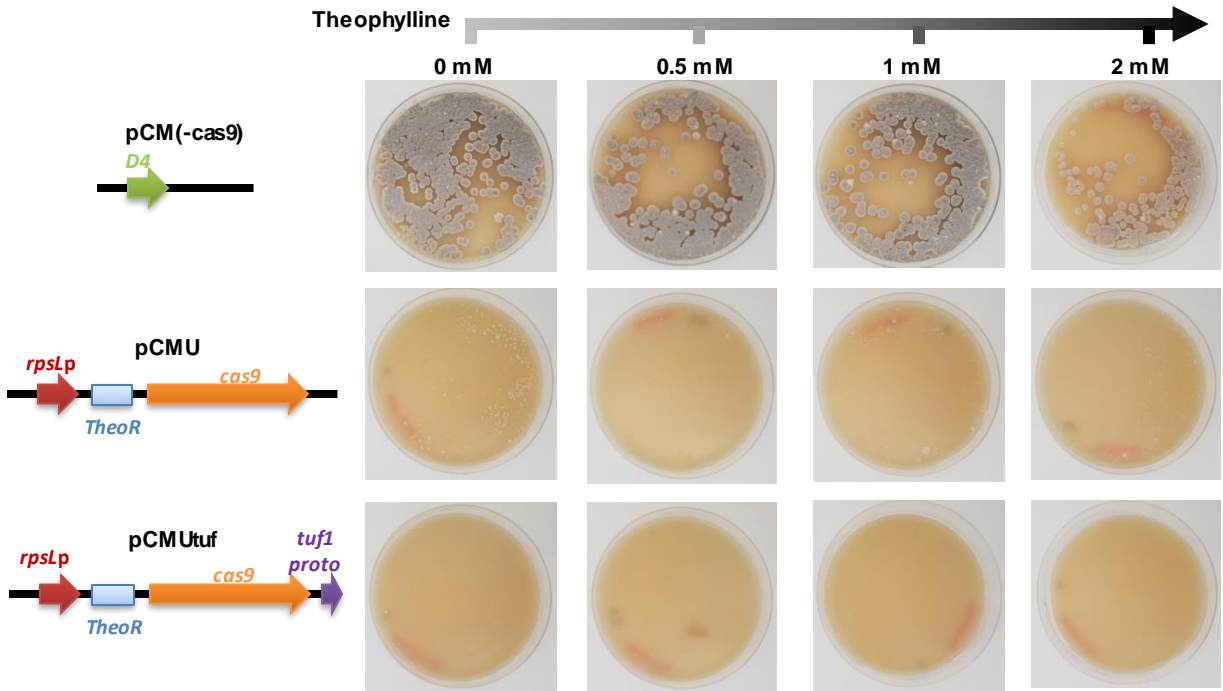

**Table S1.** Primers and synthetic DNA used in this study

| <b>Primers used for constructs assembly and sequencing</b> |                                                                                                                                                                                                                                                                                                                                                                                                                                                                                                                   |
|------------------------------------------------------------|-------------------------------------------------------------------------------------------------------------------------------------------------------------------------------------------------------------------------------------------------------------------------------------------------------------------------------------------------------------------------------------------------------------------------------------------------------------------------------------------------------------------|
| <b>Name</b>                                                | <b>Sequence (5' – 3')</b>                                                                                                                                                                                                                                                                                                                                                                                                                                                                                         |
| oriT rev Gibson                                            | ctgacttccgctgcagggctcatggctctgccctcgg                                                                                                                                                                                                                                                                                                                                                                                                                                                                             |
| pCM fw Gibson                                              | tgagaattcagatctacgc                                                                                                                                                                                                                                                                                                                                                                                                                                                                                               |
| rpsLp fw Gibson                                            | gcccgaaggcagagccatgagccctgcaggcggagaagtc                                                                                                                                                                                                                                                                                                                                                                                                                                                                          |
| Cas9 rev Gibson                                            | cagggagtcacaaggccgc                                                                                                                                                                                                                                                                                                                                                                                                                                                                                               |
| rpsLp rev Gibson                                           | aacctatagtgagtcgtaattacgtctccgtctgctactcg                                                                                                                                                                                                                                                                                                                                                                                                                                                                         |
| Cas9 fw Gibson                                             | gagtagacgacggagacgtaaatagcactcaataagttccgggtgatacc                                                                                                                                                                                                                                                                                                                                                                                                                                                                |
| pCMU-4 Gibson fw                                           | cccgtcggctggaaaacacttgaaccaacttaggatacttccggtaaccaatcagactcac                                                                                                                                                                                                                                                                                                                                                                                                                                                     |
| pCMU-4 Gibson rev                                          | ggaaagtaacctaaagtggatcaagtgtttcagccgacgggtcattggctgccctcgg                                                                                                                                                                                                                                                                                                                                                                                                                                                        |
| OriT-F                                                     | ttgggacagtcagaaaagtcagaaaacctaggcaggtcagcggatcttttc                                                                                                                                                                                                                                                                                                                                                                                                                                                               |
| OriT-R                                                     | ccaaaaggagcctttaaattgctagctgcaggtccccgggga                                                                                                                                                                                                                                                                                                                                                                                                                                                                        |
| dgly GA Prot1 fw                                           | gtaactgaaaggggatagcgcgtccgccttgtaacagggggttttagactgaaataagc                                                                                                                                                                                                                                                                                                                                                                                                                                                       |
| dgly GA UNS1 rev                                           | gagacgagacgagacagcctgagaatggatgcgagtaaagtctcttccaaagtggagaa                                                                                                                                                                                                                                                                                                                                                                                                                                                       |
| dgly F1 UNS1 fw                                            | cattactcgcatacattctcaggctgtctcgtctcgtctcgaagtcgagggtgtccagct                                                                                                                                                                                                                                                                                                                                                                                                                                                      |
| dgly F1 UNS3 rev                                           | cgacctgtagtttccagtcgcatgaggaacctcagtcgaggggtcctgccagac                                                                                                                                                                                                                                                                                                                                                                                                                                                            |
| dgly F2.1 UNS3 fw                                          | gcaactgaaaggctctcaatcgcactggaaacatcaaggcgaagctcggggccggcgtctt                                                                                                                                                                                                                                                                                                                                                                                                                                                     |
| dgly F2 UNS9 rev                                           | cagtgctctgtgggtccgattcgcagatgataaggaaacgtaacggcgccgacagcagctc                                                                                                                                                                                                                                                                                                                                                                                                                                                     |
| dgly GA UNS9 fw                                            | gttcttatactctggcgaatcggaccacaagaactcgggcaagccctcggctttc                                                                                                                                                                                                                                                                                                                                                                                                                                                           |
| dgly GA UNS2 rev                                           | gcttggattctcgtttgttctcgtctcgaactcccagcctaggtttctgcactttctgac                                                                                                                                                                                                                                                                                                                                                                                                                                                      |
| dgly GA UNS2 fw                                            | gctgggagttcgtatagcggaaaacaaacgcagaaatcaagcgtcaggtcagcggatctt                                                                                                                                                                                                                                                                                                                                                                                                                                                      |
| dgly GA Prot1 rev                                          | ccccgtgatacaaggcggacgcgatacccccttcaatac                                                                                                                                                                                                                                                                                                                                                                                                                                                                           |
| Fragment seq rev                                           | gcgtcgaattttgtgatgct                                                                                                                                                                                                                                                                                                                                                                                                                                                                                              |
| Act-gRNA-F                                                 | acgccgaaagcaatatcgcgcacc                                                                                                                                                                                                                                                                                                                                                                                                                                                                                          |
| Act-gRNA-R                                                 | aaacgggtgcgcaattgtcttctg                                                                                                                                                                                                                                                                                                                                                                                                                                                                                          |
| Act-HA1-F                                                  | tcgggtgccccggcgtttttatctagaaatgactctcagcggctcctggg                                                                                                                                                                                                                                                                                                                                                                                                                                                                |
| Act-HA1-R                                                  | ctcggcgggctggggaactactgatacagaaattctcgtctcctggg                                                                                                                                                                                                                                                                                                                                                                                                                                                                   |
| Act-HA2-F                                                  | tcagtagtccccagcccgc                                                                                                                                                                                                                                                                                                                                                                                                                                                                                               |
| Act-HA2-R                                                  | gcggccttttaccggtcctgcctctagattgccgacggagtcacggc                                                                                                                                                                                                                                                                                                                                                                                                                                                                   |
| <b>Primers used for DNA verification of mutant strains</b> |                                                                                                                                                                                                                                                                                                                                                                                                                                                                                                                   |
| <b>Name</b>                                                | <b>Sequence (5' – 3')</b>                                                                                                                                                                                                                                                                                                                                                                                                                                                                                         |
| dGly SCO check fw                                          | ttcggcttccctggacg                                                                                                                                                                                                                                                                                                                                                                                                                                                                                                 |
| dGly SCO check rev                                         | cgctgttcaactggctcgtc                                                                                                                                                                                                                                                                                                                                                                                                                                                                                              |
| SCO1660 check fw                                           | cctgggtcactctggaacct                                                                                                                                                                                                                                                                                                                                                                                                                                                                                              |
| SCO1660 check rev                                          | atcagcaggttgttggagg                                                                                                                                                                                                                                                                                                                                                                                                                                                                                               |
| Act-edit-F                                                 | aggaaatgccagattctattgattcgg                                                                                                                                                                                                                                                                                                                                                                                                                                                                                       |
| Act-edit-R                                                 | acatctgggaggtgtcgaacc                                                                                                                                                                                                                                                                                                                                                                                                                                                                                             |
| Act-WT-F                                                   | ttggaaatgcaactcgtatcgaac                                                                                                                                                                                                                                                                                                                                                                                                                                                                                          |
| Act-WT-R                                                   | tcgtcgaatcaggcgaagtag                                                                                                                                                                                                                                                                                                                                                                                                                                                                                             |
| <b>Synthetic DNA</b>                                       |                                                                                                                                                                                                                                                                                                                                                                                                                                                                                                                   |
| <b>Name</b>                                                | <b>Sequence (5' – 3')</b>                                                                                                                                                                                                                                                                                                                                                                                                                                                                                         |
| tuf1prot                                                   | gagacacttttgaagacaaacgcgtcgtgacgacacttgtaagttttagactagaaatagcaagtaaaataaggctagtccg<br>ttaatacactgaaaaagtggaccgagtcgggtccttttttagcataacccttggggcctctaaacgggtctttaggggtttttggc<br>tgctcttccggtcggacgtcgtctacgggcaacctaccgacgctcggctgtgcaacggacggatcgggcaactggccga<br>tgctgggagaaagcgcgtcgtgacggcgcgacgggtgcggagccctcggcgaagcgggtgaaacttctgtgaaatggcctgt<br>tcggtgtctttttatacggctgccaagaaagcctgcaatctgggaggcctaccgataatcggggcgttctgcaattcttag<br>tgcgagatactgaaagggaatcgggtccggcaccctcgcggagtttaagtcttcttcaactcgtggc |
| ter-ermE*p-RBS                                             | atgagcagctccggaagctggcccgctagcaatgaaaggctccttttggaccttttttgcggtcgaacttgaaggctggcggag<br>agggtcggggaggaactgacccaagcgttccacagtggaaccgcaagctgtgttgggcaacaactgctcgggttggtaggaccc<br>agcggagcaacggaggaacggacatggaacaaagaaatcagcctcggcctggacacggcaacaaacgcgtgggctggcgggt<br>cactaccgagatcaaggctccctcaagaagtcaaggctcgggcaacacccaaggcactcgaatagaagaactgat<br>cggcggctgtcttcaagcggcgaacccggcaggcgaaccgcctgaagcggaccggcgtcggcctacaccggcga<br>gaaccgactctgactcctgaggaagacttctccaacagagatggcc                                 |
